# Supplementary material for: Integrated Serum Metabolome and Gut Microbiome to Decipher Chicken Amino Acid Improvements Induced by Medium-Chain Monoglycerides
Source: MDPI journal article supplement (doi:10.3390/metabo13020208), 2023-01-30
Supplement: s1 [file s1]

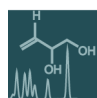**Table S1.** Composition and nutrient level of the basal diet for starter (1 to 28 d) and finisher (29 to 70 d) phase of broilers.

|                                     | Starter (day 1 to 28) | Finisher (day 29 to 56) |
|-------------------------------------|-----------------------|-------------------------|
| Ingredients, %                      |                       |                         |
| Corn                                | 54.7                  | 60.5                    |
| Wheat                               | 5                     | 5                       |
| Soybean meal                        | 29                    | 23                      |
| Corn gluten meal                    | 6                     | 6                       |
| Soybean oil                         | 1.0                   | 1.5                     |
| Dicalcium phosphate                 | 1.7                   | 1.5                     |
| Limestone                           | 1.3                   | 1.2                     |
| Sodium chloride                     | 0.30                  | 0.30                    |
| Vitamin-mineral premix <sup>1</sup> | 1.00                  | 1.00                    |
| Calculated composition, %           |                       |                         |
| Metabolizable energy (MJ/kg)        | 12.17                 | 12.55                   |
| Lysine                              | 1.1                   | 0.95                    |
| Methionine                          | 0.45                  | 0.40                    |
| Analyzed composition, %             |                       |                         |
| Crude protein                       | 20.96                 | 18.89                   |
| Calcium                             | 0.99                  | 0.89                    |
| Total phosphorus                    | 0.66                  | 0.60                    |
| Methionine + cystine                | 0.85                  | 0.72                    |

<sup>1</sup>Supplied per kilogram of diet: Vitamin A 9600 IU, Vitamin D 2700 IU, Vitamin E 36 mg, Vitamin K<sub>3</sub> 3.00 mg, Vitamin B<sub>1</sub> 3.00 mg, Vitamin B<sub>2</sub> 10.5 mg, Vitamin B<sub>6</sub> 4.2 mg, nicotinic acid 60.00 mg, D-calcium pantothenate 18 mg, folic acid 1.50 mg, biotin 0.225 mg, ZnSO<sub>4</sub>·H<sub>2</sub>O 212.52 mg, CuSO<sub>4</sub>·H<sub>2</sub>O 33.18 mg, FeSO<sub>4</sub>·H<sub>2</sub>O 247.75 mg, MnSO<sub>4</sub>·H<sub>2</sub>O 263.98 mg, Ca(IO<sub>3</sub>)<sub>2</sub> 85.80 mg, Na<sub>2</sub>SeO<sub>3</sub> 37.60 mg.

**Table S2.** The sequence of primers.

| Name                                                                 | GeneBank ID    | Sequence (5'-3')                                            |
|----------------------------------------------------------------------|----------------|-------------------------------------------------------------|
| GAPDH, Glyceraldehyde-3-phosphate dehydrogenase                      | NM_204305.1    | F: ACTGTCAAGGCTGAGAACGG<br>R: AGCTGAGGGAGCTGAGATGA          |
| mTOR, Mammalian target of rapamycin                                  | XM_417614.4    | F: AGTGAGAGTGATGCGGAGAG<br>R: GAAACCTTGGACAGCGGG            |
| S6K1, Ribosomal p70 S6 Kinase                                        | NM_001030721.1 | F: GGTGGAGTTTGGGGGCATTA<br>R: GAAGAACGGGTGAGCCTAA           |
| 4EBP1, Eukaryotic translation initiation factor 4E-binding protein 1 | XM_424384.4    | F: GCGAATGTAGGTGAAGAAGAGC<br>R: GGCTGGTGGGAATCCTCAAA        |
| Akt, Serine/threonine protein kinase B                               | NM_001005838.1 | F: CATTCCCGCCATTATGAATGAAGTA<br>R: CTTGTAGCCAATGAATGTGCCATC |
| FOXO1, Forkhead box protein O1                                       | NM_204328.1    | F: CATAACCAGCCAACACCTGC<br>R: AATTCCCACCCTTCCGTAGC          |
| FOXO4, Forkhead box O4                                               | XM_426261      | F: CTCGCTAAGGTCAGAAGTAAA<br>R: TCCTCAGTCACGGTTGGT           |
| MURF1, Muscle RING-finger protein-1                                  | XM_424369.4    | F: GAACCTGCTGGTGGGAGAACA                                    |

|                                   |              |                                                                               |
|-----------------------------------|--------------|-------------------------------------------------------------------------------|
| MEF2A, Myocyte enhancer factor 2A | NM_204864    | R: GTGCTCCCCCTTCTTGAGTG<br>F: TCACGAGAATAATGGACGAA<br>R: TGCTGGCATACTGAAAGAGT |
| MEF2B, Myocyte enhancer factor 2B | XM_430389    | F: CACAGCCTCACTGGTTTCCC<br>R: GACACCCGCTCTGACTTGATG                           |
| MEF2C, Myocyte enhancer factor 2C | XM_001231661 | F: TGAGCGTAACAGACAGGTGAC<br>R: GCGTAAGAGGAGTCAGGATCG                          |
| MEF2D, Myocyte enhancer factor 2D | NM_001031600 | F: GAGCGTGTGTGCGACTG<br>R: GCTGCCTTTACGGTATTTATCC                             |

Table S3. Dietary MG affects chicken amino acid content.

| g/100g dry material | CON            | MG              |
|---------------------|----------------|-----------------|
| Aspartic acid       | 7.186 ± 0.785  | 7.675 ± 0.551   |
| Glutamic acid       | 5.902 ± 0.572  | 6.364 ± 0.316*  |
| Serine              | 2.921 ± 0.256  | 3.132 ± 0.123*  |
| Glycine             | 3.620 ± 0.312  | 3.934 ± 0.106** |
| Alanine             | 4.734 ± 0.411  | 5.074 ± 0.227*  |
| EAA                 |                |                 |
| Lysine              | 6.172 ± 0.815  | 6.824 ± 0.751   |
| Methionine          | 2.469 ± 0.216  | 2.661 ± 0.118*  |
| Threonine           | 3.532 ± 0.300  | 3.744 ± 0.128*  |
| Leucine             | 6.716 ± 0.627  | 7.180 ± 0.304*  |
| Isoleucine          | 4.261 ± 0.391  | 4.548 ± 0.265   |
| Arginine            | 5.086 ± 0.630  | 5.553 ± 0.505   |
| Valine              | 4.105 ± 0.437  | 4.338 ± 0.364   |
| Phenylalanine       | 3.419 ± 0.301  | 3.650 ± 0.164*  |
| Histidine           | 3.454 ± 0.358  | 3.542 ± 0.298   |
| Σ EAA               | 30.675 ± 2.588 | 32.946 ± 1.561* |
| Proline             | 2.997 ± 0.248  | 3.254 ± 0.097** |
| Tyrosine            | 3.216 ± 0.266  | 3.437 ± 0.154*  |
| Cysteine            | 0.641 ± 0.120  | 0.697 ± 0.130   |
| Σ AA                | 70.566 ± 6.241 | 75.607 ± 3.514* |

Chicken amino acid content was published in a previous study [9]. Chicks fed a basal diet (the control group, CON) or a basal diet enriched with 300 mg/kg MG (MG). Σ EAA, all detected essential amino acids; Σ AA, all detected amino acids. Data expressed as mean ± SD ( $n = 12$ , \*\*  $p < 0.01$ ).
